# Supplementary material for: Proteomic response of methicillin-resistant S. aureus to a synergistic antibacterial drug combination: a novel erythromycin derivative and oxacillin
Source: PubMed Central journal article supplement (PMC4726183; doi:10.1038/srep19841), 2016-01-25
Supplement: srep19841-s1.pdf [file srep19841-s1.pdf]

# Supporting Information

## Proteomic response of methicillin-resistant *S. aureus* to a synergistic antibacterial drug combination: a novel erythromycin derivative and oxacillin

Xiaofen Liu <sup>1,2,3§</sup>, Pei-Jin Pai <sup>1,4,5§</sup>, Weipeng Zhang <sup>6</sup>, Yingwei Hu <sup>1</sup>, Xiaojing Dong <sup>7</sup>, Pei-yuan Qian <sup>6</sup>, Daijie Chen <sup>7,8\*</sup>, Henry Lam <sup>1,9\*</sup>

1 Department of Chemical and Biomolecular Engineering, The Hong Kong University of Science and Technology, Clear Water Bay, Kowloon, Hong Kong

2 Institute of Antibiotics, Huashan Hospital affiliated to Fudan University, Shanghai, China

3 Key Laboratory of Clinical Pharmacology of Antibiotics, National Population and Family Planning Commission, Shanghai, China

4 Graduate School of Medicine, Kaohsiung Medical University, Kaohsiung, Taiwan

5 Center for Infectious Disease and Cancer Research, Kaohsiung Medical University, Kaohsiung, Taiwan

6 KAUST Global Partnership program, Division of Life Science, The Hong Kong University of Science and Technology, Clear Water Bay, Kowloon, Hong Kong

7 State Key Laboratory of New Drug and Pharmaceutical Process, Shanghai Institute of Pharmaceutical Industry, China State Institute of Pharmaceutical Industry, Shanghai, China

8 School of Pharmacy, Shanghai Jiao Tong University, Shanghai, China

9 Division of Biomedical Engineering, The Hong Kong University of Science and Technology, Clear Water Bay, Kowloon, Hong Kong

§ Xiaofen Liu and Pei-Jing Pai contributed equally to this work.

\* Correspondence should be addressed to H. N. Lam (kehlam@ust.hk), D. Chen ([hccb001@163.com](mailto:hccb001@163.com)).

## Table of contents

### Supplementary Figures

**Figure S1:** Growth Curves for the experimental conditions.

**Figure S2:** KEGG pathway (a) and SEED analysis (b) for the differentially expressed proteins in SIPI-8294/Oxa treatment group; KEGG pathway (c) and SEED analysis (d) for all the identified proteins in SIPI-8294/Oxa treatment group

**Figure S3:** The enzymes involved in cell wall biosynthesis.

**Figure S4:** (a) The enzymes differentially expressed in carbohydrate metabolism pathways; \* stands for AMP-dependent synthetase and ligase; (b) the enzymes differentially expressed in nitrogen and purine/pyrimidine metabolism pathways.

### Supplementary Tables

**Table S1:** The differentially expressed proteins in different treatment groups

**Table S2.** Minimum inhibitory concentrations (MIC) of oxacillin in the presence of SIPI-8294 and erythromycin against MRSA (ATCC43300), and the fractional inhibitory concentration (FIC) indexes in each case.

## Supplementary Figures

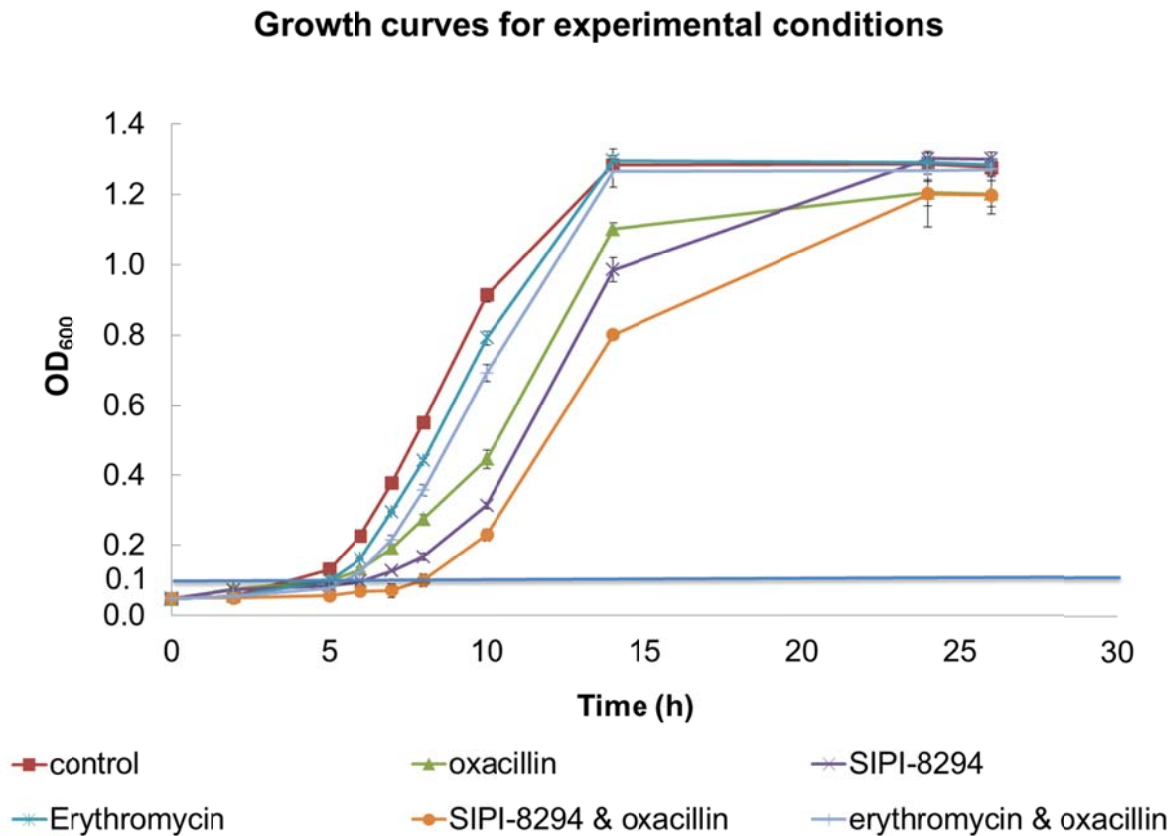

**Figure S1:** Growth Curves for the experimental conditions. Control: MRSA cells without drug treatment; Oxacillin: MRSA cells treated with 1/8 MIC of oxacillin (8  $\mu\text{g}/\text{mL}$ ); SIPI-8294: MRSA cells treated with 8  $\mu\text{g}/\text{mL}$  SIPI-8294; Erythromycin: MRSA cells treated with 1/8 MIC of erythromycin (32  $\mu\text{g}/\text{mL}$ ); SIPI-8294/Oxa: MRSA cells treated with 8  $\mu\text{g}/\text{mL}$  SIPI-8294 and 0.03125  $\mu\text{g}/\text{mL}$  oxacillin; Ery/Oxa: MRSA cells treated with 32  $\mu\text{g}/\text{mL}$  erythromycin and 0.03125  $\mu\text{g}/\text{mL}$  oxacillin. In the proteomic analysis, all the cells were collected when  $\text{OD}_{600}$  reached 0.1 (the blue line).

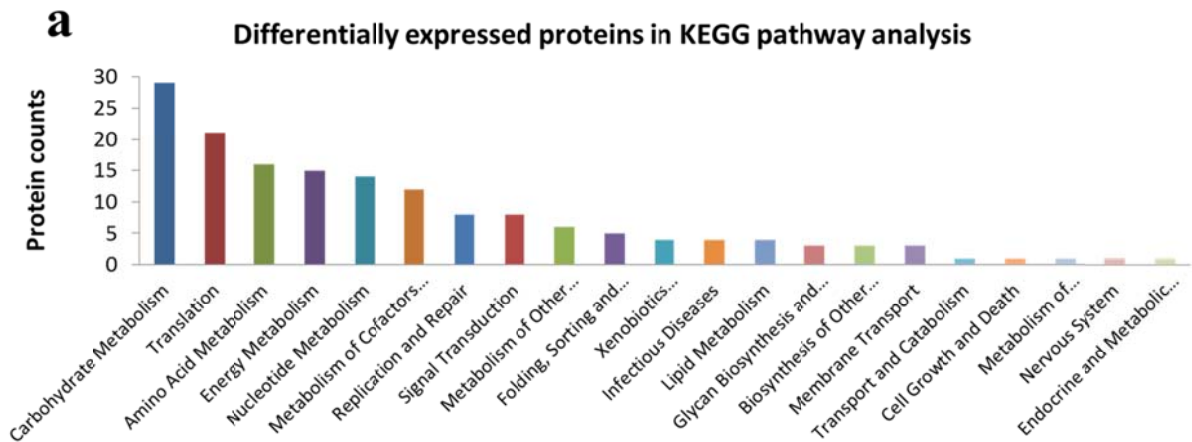

**b** Differentially expressed proteins in SEED analysis

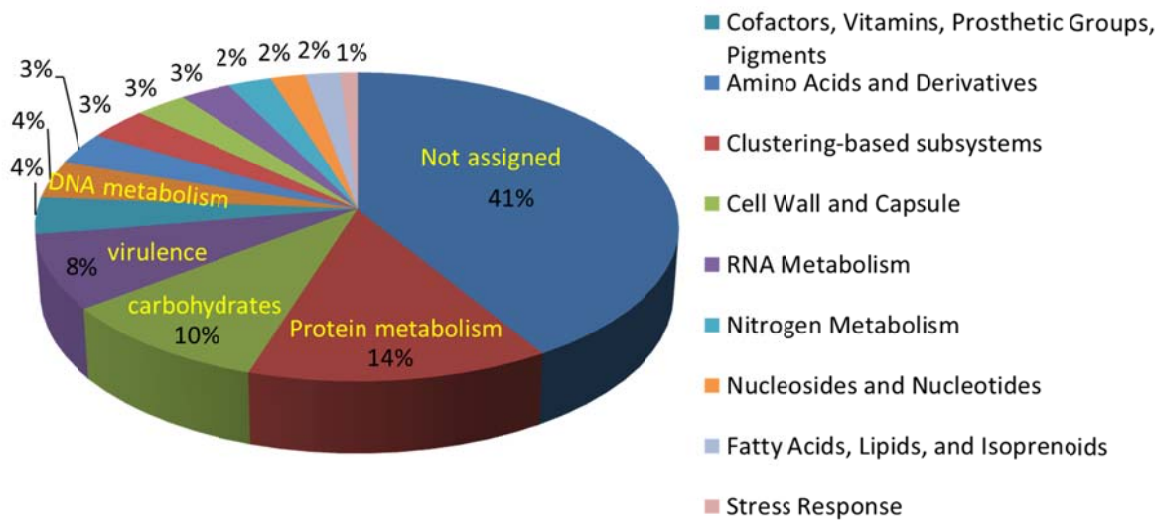

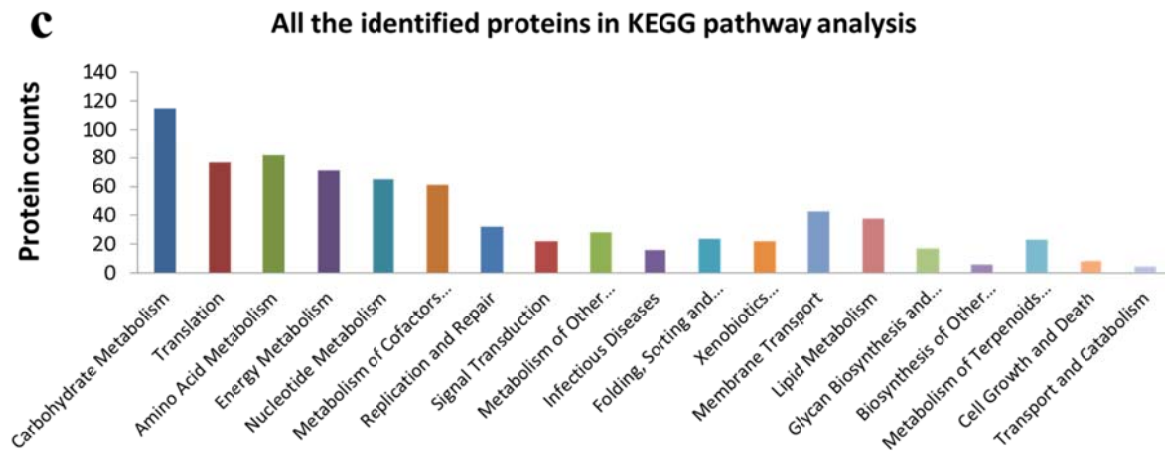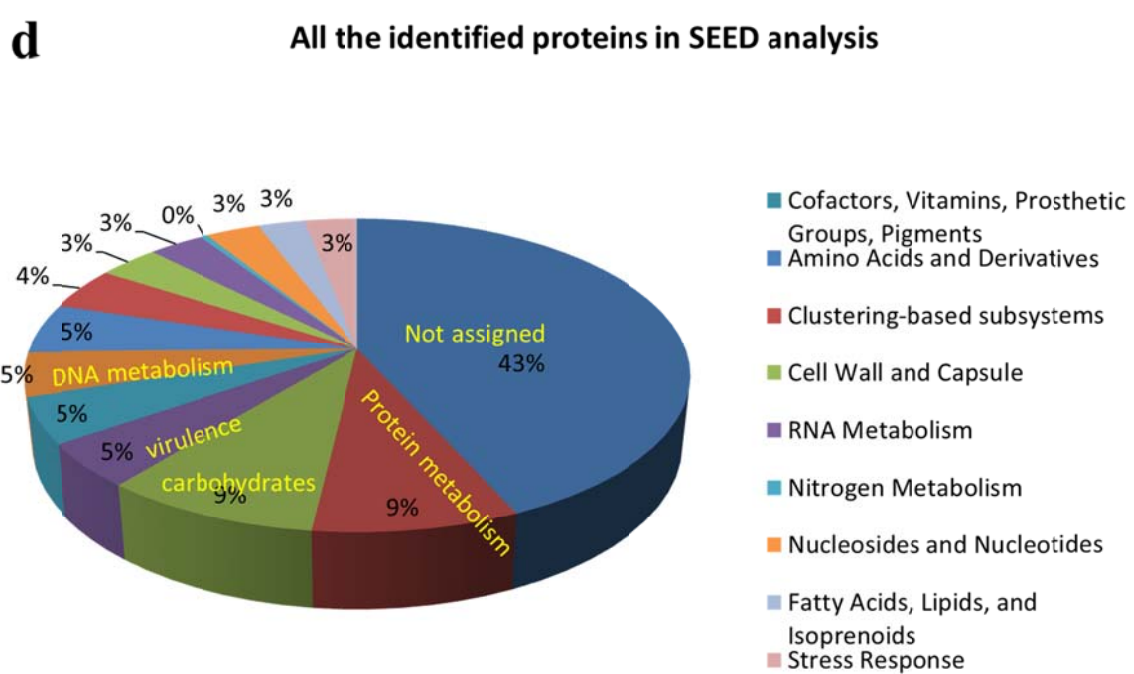

**Figure S2:** KEGG pathway (a) and SEED analysis (b) for the differentially expressed proteins in SIPI-8294/Oxa treatment group; KEGG pathway (c) and SEED analysis (d) for all the identified proteins in SIPI-8294/Oxa treatment group

a

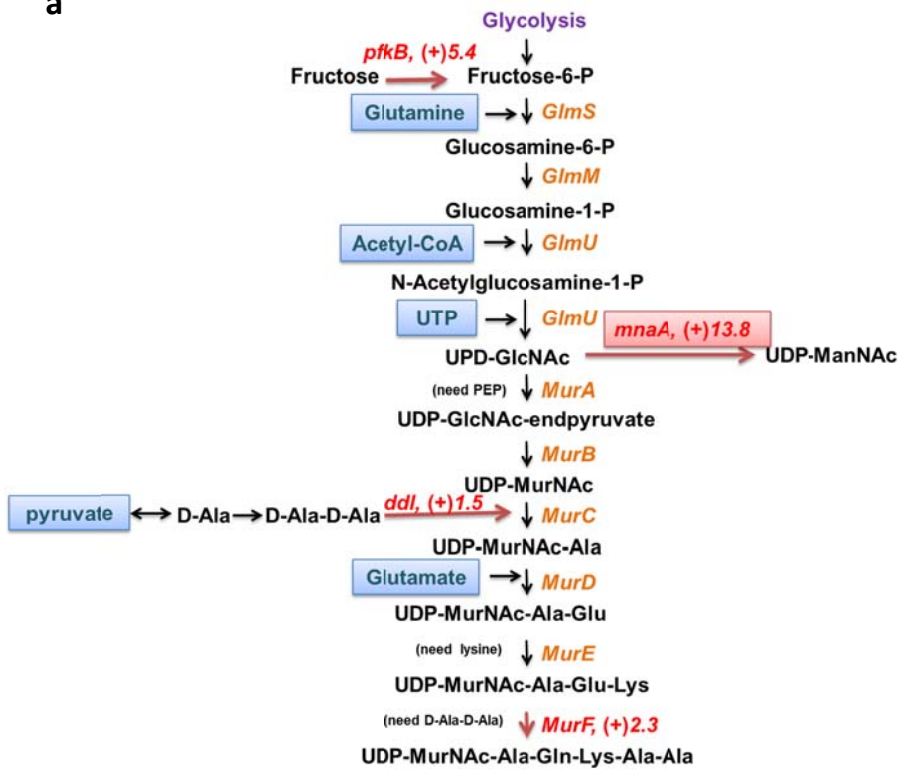

b

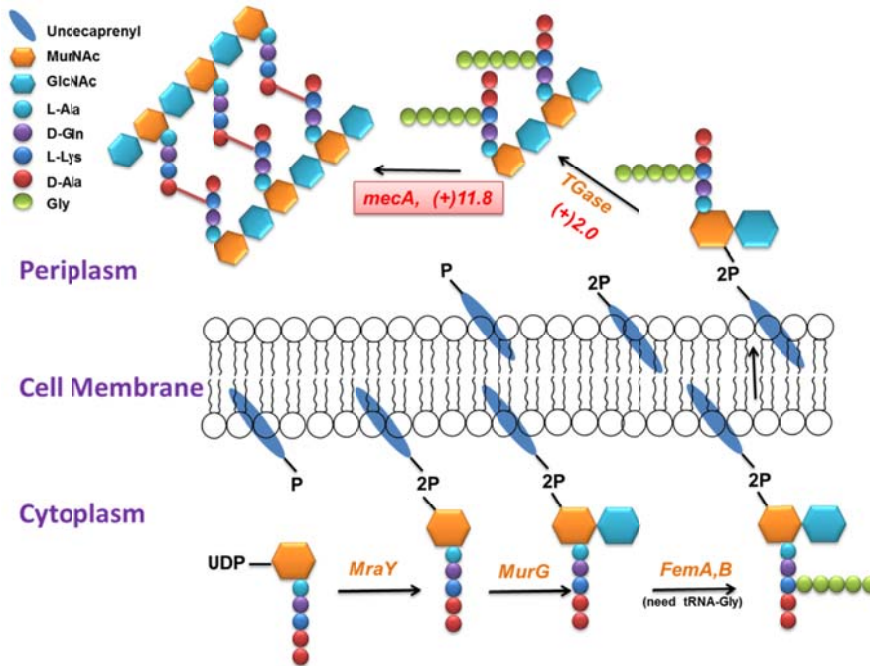

**Figure S3:** The enzymes involved in cell wall biosynthesis: (a) The synthesis of UDP-MurNAc-Ala-Gln-Lys-Ala-Ala which is the blocks for building cell wall. (b) The process of transferring the blocks from cytoplasm to periplasm, and the following transpeptidation steps for the cell wall synthesis. The metabolites in blue boxes are the chemical components needed for the reaction step. The enzymes are labeled by their corresponding gene names. The symbol of (+) stands for up-regulated; number behind the gene name is the fold change. The enzymes with up-regulated fold changes more than 10 are highlighted in red boxes.

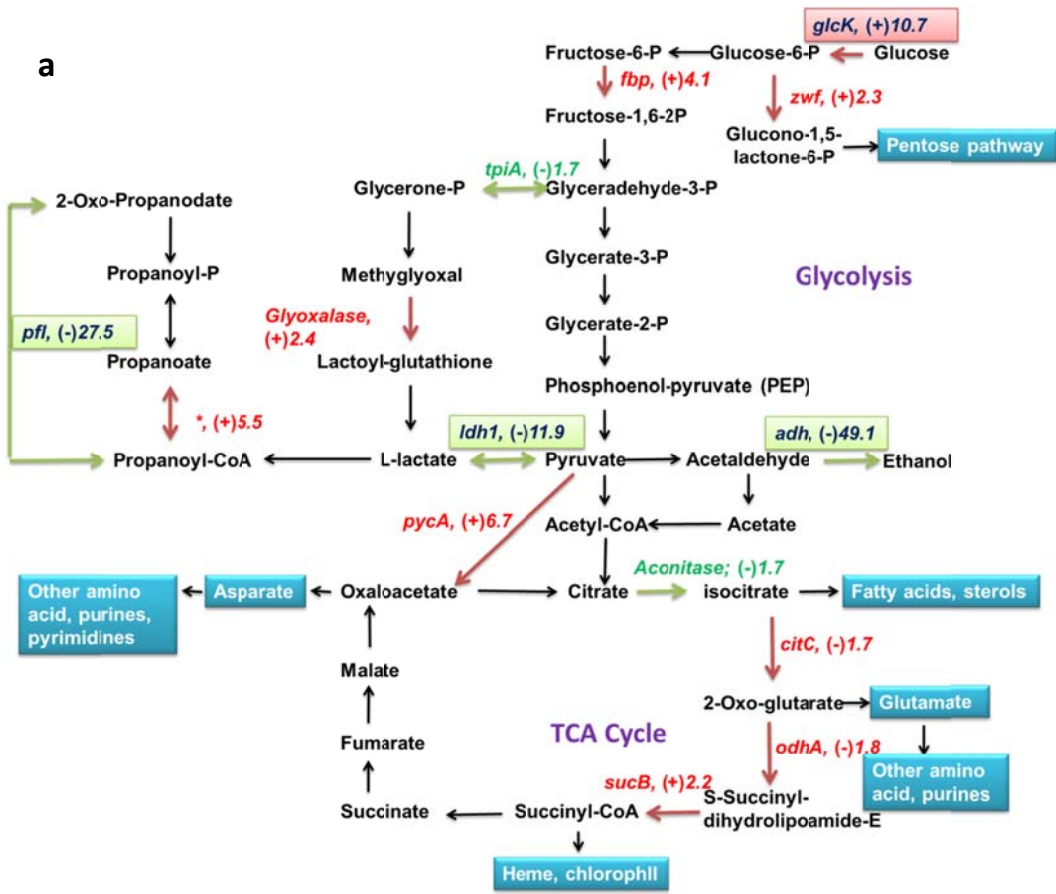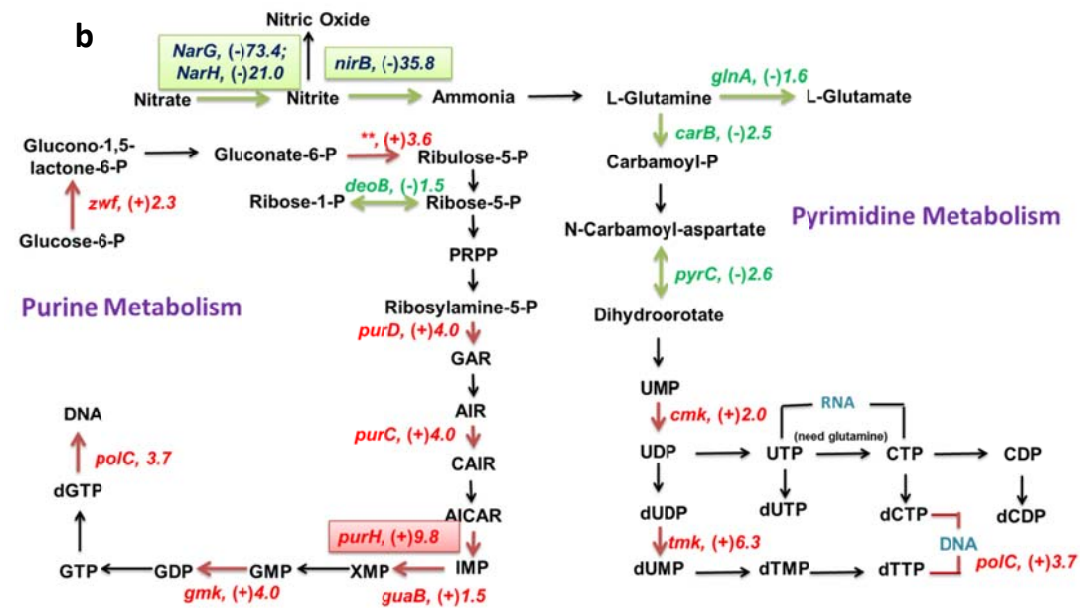



**Figure S4:** (a) The enzymes differentially expressed in carbohydrate metabolism pathways; \* stands for AMP-dependent synthetase and ligase; (b) the enzymes differentially expressed in nitrogen and purine/pyrimidine metabolism pathways; \*\* stands for 6-phosphogluconate dehydrogenase, decarboxylating (EC 1.1.1.44). The enzymes are labeled by their corresponding gene names. The symbol of (+) stands for up-regulated and the symbol of (-) stands for down-regulated; number behind the gene name is the fold change. The enzymes with up-regulated and down-regulated fold changes more than 10 are highlighted in red and green boxes, respectively.

**Table S1: The differentially expressed proteins in different treatment groups**

| Uniprot_AC                                        | gene             | protein                                                            | fold change            |                        |           |         |                       | pathway                                                                                                                                     |
|---------------------------------------------------|------------------|--------------------------------------------------------------------|------------------------|------------------------|-----------|---------|-----------------------|---------------------------------------------------------------------------------------------------------------------------------------------|
|                                                   |                  |                                                                    | 8294+Oxa               | Ery+Oxa                | SIP1-8294 | Oxa     | Ery                   |                                                                                                                                             |
| Carbohydrates                                     |                  |                                                                    |                        |                        |           |         |                       |                                                                                                                                             |
| A5IQX6                                            | SaurJH9_0797     | Glyceraldehyde-3-phosphate dehydrogenase (EC 1.2.1.12)             | -                      | -                      | -         | (+)1.5  |                       |                                                                                                                                             |
| A5IT75                                            | SaurJH9_1605     | Glucokinase (EC 2.7.1.2)                                           | (+)10.7<br>(Induction) | (+)11.8<br>(Induction) | -         | -       | (+)7.3<br>(Induction) | Amino sugar and nucleotide sugar metabolism; Starch and sucrose metabolism; Glycolysis / Gluconeogenesis; Galactose metabolism              |
| A5ITV7                                            | pckA             | Phosphoenolpyruvate carboxykinase [ATP] (EC 4.1.1.49)              | (+)4.0                 | (+)3.3                 | -         | -       | -                     | Citrate cycle (TCA cycle); Carbon fixation in photosynthetic organisms; Glycolysis / Gluconeogenesis; Pyruvate metabolism                   |
| A5ITM5                                            | SaurJH9_1758     | Malate dehydrogenase (Oxaloacetate-decarboxylating) (EC 1.1.1.38)  | (-)1.7                 | -                      | -         | -       | -                     | Two-component system; Pyruvate metabolism                                                                                                   |
| A6QFW9                                            | pycA             | Pyruvate carboxylase (EC 6.4.1.1)                                  | (+)6.7                 | ND                     | (+)12.4   | -       | -                     | Citrate cycle (TCA cycle); Carbon fixation pathways in prokaryotes; Pyruvate metabolism                                                     |
| A5IT65                                            | gcvT             | Aminomethyltransferase (EC 2.1.2.10)                               | -                      | -                      | (+)1.5    | -       | -                     | Glycine, serine and threonine metabolism; Nitrogen metabolism; One carbon pool by folate                                                    |
| A5IQE2                                            | SaurJH9_0611     | Phosphotransacetylase (EC 2.3.1.8)                                 | (-)1.6                 | -                      | -         | -       | -                     | Carbon fixation pathways in prokaryotes; Taurine and hypotaurine metabolism; Methane metabolism; Propanoate metabolism; Pyruvate metabolism |
| A5IP09                                            | deoB             | Phosphopentomutase (EC 5.4.2.7)                                    | (-)1.5                 | -                      | -         | -       | -                     | Pentose phosphate pathway; Purine metabolism                                                                                                |
| A5IU25                                            | SaurJH9_2237     | Acetolactate synthase, large subunit (EC 2.2.1.6)                  | ND                     | ND                     | ND        | (+)26.1 | -                     | Butanoate metabolism; Valine, leucine and isoleucine biosynthesis; Pantothenate and CoA biosynthesis                                        |
| A5IQC5                                            | SaurJH9_0594     | Hexulose-6-phosphate isomerase (EC 5....-)                         | -                      | (+)3.2                 | -         | -       | (+)3.8                | Methane metabolism; Pentose and glucuronate interconversions; Pentose phosphate pathway                                                     |
| A5IPA9                                            | ldh1             | L-lactate dehydrogenase 1 (L-LDH 1) (EC 1.1.1.27)                  | (-)11.9                | (-)3.5                 | -         | (+)1.6  | (-)3.5                | Cysteine and methionine metabolism; Glycolysis / Gluconeogenesis; Propanoate metabolism; Pyruvate metabolism                                |
| A5IW27                                            | ldh2             | L-lactate dehydrogenase 2 (L-LDH 2) (EC 1.1.1.27)                  | (-)1.9                 | (-)2.2                 | -         | -       | (-)2.0                | Cysteine and methionine metabolism; Glycolysis / Gluconeogenesis; Propanoate metabolism; Pyruvate metabolism                                |
| A5ISU5                                            | odhA             | 2-oxoglutarate dehydrogenase E1 component (EC 1.2.4.2)             | (+)1.8                 | -                      | -         | -       | -                     | Tryptophan metabolism; Citrate cycle (TCA cycle); Lysine degradation                                                                        |
| A5IWG6                                            | SaurJH9_2765     | 6-phosphogluconate dehydrogenase, decarboxylating (EC 1.1.1.44)    | (+)3.6                 | (+)3.0                 | -         | -       | -                     | Glutathione metabolism; Pentose phosphate pathway                                                                                           |
| A5IT39                                            | gnd              | 6-phosphogluconate dehydrogenase, decarboxylating (EC 1.1.1.44)    | -                      | (+)1.8                 | -         | -       | -                     | Glutathione metabolism; Pentose phosphate pathway                                                                                           |
| A5IT33                                            | SaurJH9_1562     | Glucose-6-phosphate 1-dehydrogenase (EC 1.1.1.49)                  | (+)2.3                 | -                      | -         | -       | (+)1.9                | Glutathione metabolism; Pentose phosphate pathway                                                                                           |
| A5IQ53                                            | prs              | Ribose-phosphate pyrophosphokinase (RPPK) (EC 2.7.6.1)             | -                      | (-)1.7                 | -         | -       | -                     | Pentose phosphate pathway; Purine metabolism                                                                                                |
| A5IU17                                            | fumC             | Fumarate hydratase class II (Fumarase C) (EC 4.2.1.2)              | -                      | -                      | (+)1.7    | -       | -                     | Citrate cycle (TCA cycle); Carbon fixation pathways in prokaryotes; Pathways in cancer; Renal cell carcinoma                                |
| D2N740                                            | sucB             | Dihydropyridoxyllysine-residue succinyltransferase (EC 2.3.1.61)   | (+)2.2                 | -                      | -         | -       | -                     | Citrate cycle (TCA cycle); Lysine degradation                                                                                               |
| D9RHY0                                            | citC             | Isocitrate dehydrogenase [NADP] (EC 1.1.1.42)                      | (+)1.7                 | -                      | -         | -       | -                     | Citrate cycle (TCA cycle); Carbon fixation pathways in prokaryotes; Glutathione metabolism; Peroxisome                                      |
| A5IVU3                                            | fbp              | Fructose-1,6-bisphosphatase class 3 (FBPase class 3) (EC 3.1.3.11) | (+)4.1                 | -                      | -         | -       | (+)2.1                | Fructose and mannose metabolism; Carbon fixation in photosynthetic organisms; Glycolysis / Gluconeogenesis; Pentose phosphate pathway       |
| A5IU50                                            | SaurJH9_2161     | Fructose-bisphosphate aldolase (EC 4.1.2.13)                       | -                      | (+)1.6                 | -         | -       | -                     | Fructose and mannose metabolism; Carbon fixation in photosynthetic organisms; Glycolysis / Gluconeogenesis; Pentose phosphate pathway       |
| A5IRA6                                            | SaurJH9_0928     | HAD-superfamily subfamily IIA hydrolase like protein               | -                      | (+)2.9                 | -         | -       | -                     |                                                                                                                                             |
| A5IW34                                            | SaurJH9_2631     | AMP-dependent synthetase and ligase                                | (+)5.5                 | -                      | -         | -       | -                     | Carbon fixation pathways in prokaryotes; Glycolysis / Gluconeogenesis; Propanoate metabolism; Pyruvate metabolism                           |
| A8Z015                                            | pfl              | Formate C-acetyltransferase (EC 2.3.1.54)                          | (-)27.5                | (-)5.3                 | -         | -       | (-)7.2                | Butanoate metabolism; Propanoate metabolism; Pyruvate metabolism                                                                            |
| A5IUU9                                            | mtlD             | Mannitol-1-phosphate 5-dehydrogenase (EC 1.1.1.17)                 | (-)1.8                 | -                      | -         | -       | -                     | Fructose and mannose metabolism                                                                                                             |
| A5ISM3                                            | SaurJH9_1412     | Aconitase (EC 4.2.1.3)                                             | (-)1.7                 | -                      | -         | -       | -                     | Citrate cycle (TCA cycle); Carbon fixation pathways in prokaryotes                                                                          |
| E5QRL3                                            | HMPREF0772_11158 | Sucrose-6-phosphate hydrolase (EC 3.2.1.26)                        | (+)2.9                 | (+)2.2                 | -         | -       | -                     | Starch and sucrose metabolism; Galactose metabolism                                                                                         |
| A5IU16                                            | SaurJH9_2077     | PfkB domain protein                                                | (+)5.4                 | ND                     | ND        | ND      | -                     | Amino sugar and nucleotide sugar metabolism; Fructose and mannose metabolism; Starch and sucrose metabolism                                 |
| Cofactors, Vitamins, Prosthetic Groups, Pigments; |                  |                                                                    |                        |                        |           |         |                       |                                                                                                                                             |
| A5IQD4                                            | SaurJH9_0603     | Phosphomethylpyrimidine kinase                                     | (+)2.7                 | -                      | -         | -       | -                     | Vitamin B6 metabolism                                                                                                                       |
| A6QF28                                            | NWMN_0688        | ABC transporter, ATP-binding protein                               | -                      | -                      | -         | (+)3.5  | -                     |                                                                                                                                             |
| E5QRF7                                            | lipA             | Lipoyl synthase (EC 2.8.1.8)                                       | (+)6.3                 | (+)6.9                 | -         | -       | (+)4.1                | Lipoic acid metabolism                                                                                                                      |

|                           |                              |                                                                                          |                       |                       |                        |                         |        |                                                                                                            |
|---------------------------|------------------------------|------------------------------------------------------------------------------------------|-----------------------|-----------------------|------------------------|-------------------------|--------|------------------------------------------------------------------------------------------------------------|
| E5QS29                    | nadE                         | NH(3)-dependent NAD(+) synthetase (EC 6.3.1.5)                                           | (+8.4<br>(Induction)) | (+5.5<br>(Induction)) | -                      | -                       | -      | Nicotinate and nicotinamide metabolism                                                                     |
| AS1Q72                    | pdxS                         | Pyridoxal biosynthesis lyase PdxS (EC 4.-.-.-)                                           | (-2.0)                | -                     | -                      | (-1.5)                  | -      | Vitamin B6 metabolism                                                                                      |
| E5QW19                    | panC                         | Pantothenate synthetase (PS) (EC 6.3.2.1)                                                | (+3.6)                | (+2.8)                | -                      | (+1.9)                  | -      | beta-Alanine metabolism; Pantothenate and CoA biosynthesis                                                 |
| A51T28                    | hemH                         | Ferrochelatase (EC 4.99.1.1)                                                             | ND                    | ND                    | -                      | -                       | (+2.0) | Porphyrin and chlorophyll metabolism                                                                       |
| A51T29                    | hemE                         | Uroporphyrinogen decarboxylase (UPD) (URO-D) (EC 4.1.1.37)                               | (+1.9)                | -                     | -                      | -                       | -      | Porphyrin and chlorophyll metabolism                                                                       |
| A51TJ3                    | SaurJH9_1726                 | Delta-aminolevulinic acid dehydratase (EC 4.2.1.24)                                      | (+1.7)                | -                     | -                      | -                       | -      | Porphyrin and chlorophyll metabolism                                                                       |
| A51TL2                    | coaE                         | Dephospho-CoA kinase (EC 2.7.1.24)                                                       | (+2.7)                | -                     | -                      | (+1.8)                  | -      | Pantothenate and CoA biosynthesis                                                                          |
| <b>Virulence</b>          |                              |                                                                                          |                       |                       |                        |                         |        |                                                                                                            |
| A51UH6                    | groL                         | 60 kDa chaperonin (GroEL protein)                                                        | (+2.0)                | (+1.6)                | -                      | -                       | -      | RNA degradation;                                                                                           |
| A8Z071                    | spsB                         | Sec family Type I general secretory pathway S26 family signal peptidase I (EC 3.4.21.89) | (+1.9)                | -                     | -                      | -                       | -      | Protein export                                                                                             |
| A51PF1                    | SaurJH9_0267                 | Membrane protein-like protein                                                            | ND                    | ND                    | (-2.6<br>(Repression)) | (-22.3<br>(Repression)) | ND     |                                                                                                            |
| A51RU3                    | fntA                         | protein FntA                                                                             | (+4.5<br>(Induction)) | ND                    | -                      | -                       | -      |                                                                                                            |
| A51U13                    | SaurJH9_1901                 | Transcriptional regulator, XRE family                                                    | (-2.5)                | (-1.5)                | -                      | (-1.8)                  | -      |                                                                                                            |
| D1GTW3                    | clfB                         | Fibrinogen and keratin-10 binding surfaceanchored protein                                | (-3.6)                | (-2.5)                | (-2.7)                 | -                       | -      |                                                                                                            |
| A7WX60                    | spa                          | Immunoglobulin G binding protein A                                                       | ND                    | ND                    | -                      | (-4.2)                  | -      |                                                                                                            |
| A51V44                    | SaurJH9_2287                 | Acriflavin resistance protein                                                            | (+2.2)                | ND                    | -                      | -                       | -      |                                                                                                            |
| Q6GDU5                    | fnbA                         | Fibronectin-binding protein A                                                            | (-4.0)                | (-2.2)                | -                      | -                       | -      | Bacterial invasion of epithelial cells                                                                     |
| A6U5C6                    | blaZ                         | $\beta$ -lactamase (EC 3.5.2.6)                                                          | ND                    | ND                    | ND                     | (+12.5<br>(Induction))  | ND     | $\beta$ -Lactam resistance                                                                                 |
| D8HDS7                    | SAOV_2224c                   | Ferrichrome ABC transporter lipoprotein                                                  | -                     | (-2.1)                | -                      | -                       | -      | ABC transporters                                                                                           |
| A51S94                    | gmk                          | Guanylate kinase (EC 2.7.4.8)                                                            | (+4.0<br>(Induction)) | (+4.3<br>(Induction)) | -                      | -                       | -      | Purine metabolism                                                                                          |
| AS1QX8                    | tpiA                         | Triosephosphate isomerase (TIM) (EC 5.3.1.1)                                             | (-1.7)                | -                     | -                      | -                       | -      | Fructose and mannose metabolism; Carbon fixation in photosynthetic organisms; Glycolysis / Gluconeogenesis |
| A51QU0                    | SaurJH9_0760                 | Periplasmic binding protein                                                              | (-4.7)                | (-4.4)                | -                      | -                       | -      | ABC transporters                                                                                           |
| D8HHN1                    | SAOV_0999c                   | Autolysin                                                                                | (-2.3)                | (-4.2)                | -                      | (-2.5)                  | -      |                                                                                                            |
| A51N50                    | mecA                         | Penicillin binding protein 2a (EC 2.4.1.129)                                             | (+11.8)               | (+42.0)               | ND                     | (+145.1)                | ND     | $\beta$ -Lactam resistance                                                                                 |
| A51VD4                    | SaurJH9_2377                 | Multidrug resistance efflux pump-like protein                                            | -                     | -                     | -                      | (+1.6)                  | -      |                                                                                                            |
| A51RB3                    | SaurJH9_0935                 | DltD, central domain protein                                                             | (+4.6)                | -                     | -                      | -                       | -      | Staphylococcus aureus infection                                                                            |
| A51NS9                    | SaurJH9_0040<br>SaurJH9_1714 | Streptomycin 3''-adenylyltransferase (EC 2.7.7.47)                                       | (+2.9)                | -                     | -                      | -                       | -      |                                                                                                            |
| A51PU8                    | rpsR                         | 30S ribosomal protein S18                                                                | (-2.0)                | (-1.7)                | -                      | -                       | -      | Ribosome                                                                                                   |
| Q6GIX3                    | mco                          | Multicopper oxidase mco (EC 1.-.-.-)                                                     | (+4.0<br>(Induction)) | ND                    | ND                     | ND                      | ND     |                                                                                                            |
| <b>Protein Metabolism</b> |                              |                                                                                          |                       |                       |                        |                         |        |                                                                                                            |
| A51SH6                    | miaB                         | (Dimethylallyl)adenosine tRNA methylthiotransferase MiaB (EC 2.-.-.-)                    | (+12.8)               | ND                    | -                      | -                       | -      |                                                                                                            |
| A51TA4                    | SaurJH9_1634                 | RNA modification enzyme, MiaB family (EC 1.3.1.74)                                       | (+2.4)                | (+2.0)                | -                      | -                       | -      |                                                                                                            |
| A51T57                    | efp                          | Elongation factor P (EF-P)                                                               | -                     | -                     | (-2.3)                 | -                       | -      |                                                                                                            |
| E5QRA6                    | clpB                         | ATP-dependent chaperone protein ClpB                                                     | (+4.3)                | (+3.0)                | -                      | (+2.8)                  | -      |                                                                                                            |
| A51UH6                    | groL                         | 60 kDa chaperonin (GroEL protein)                                                        | (+2.0)                | (+1.6)                | -                      | -                       | -      | RNA degradation                                                                                            |
| A6QI23                    | prsA                         | Foldase protein PrsA (EC 5.2.1.8)                                                        | (+9.6)                | (+4.3)                | (+1.7)                 | -                       | -      |                                                                                                            |
| E5QVW1                    | asnS                         | AsparagineNDtRNA ligase (EC 6.1.1.22)                                                    | (+1.7)                | -                     | -                      | -                       | -      | Aminoacyl-tRNA biosynthesis                                                                                |
| A51T95                    | era                          | GTPase Era                                                                               | (+2.6)                | -                     | (-1.9)                 | -                       | -      |                                                                                                            |
| A51T88                    | obg                          | GTPase obg (GTP-binding protein obg)                                                     | (+1.7)                | (+1.6)                | -                      | -                       | -      |                                                                                                            |
| A51T03                    | der                          | GTPase Der (GTP-binding protein EngA)                                                    | -                     | -                     | -                      | (+1.7)                  | -      |                                                                                                            |
| A51TC4                    | SaurJH9_1654                 | Nitric-oxide synthase (EC 1.14.13.39)                                                    | (+2.5)                | -                     | -                      | -                       | -      |                                                                                                            |
| A51PU4                    | SaurJH9_0411                 | GTP-binding protein YchF                                                                 | (-1.5)                | -                     | -                      | -                       | -      |                                                                                                            |
| A51V31                    | rplB                         | 50S ribosomal protein L2                                                                 | (-1.9)                | -                     | (-1.8)                 | -                       | -      | Ribosome                                                                                                   |
| A51V33                    | rplD                         | 50S ribosomal protein L4                                                                 | -                     | (+2.1)                | -                      | -                       | -      | Ribosome                                                                                                   |
| A51V22                    | rplE                         | 50S ribosomal protein L5                                                                 | -                     | (+1.8)                | -                      | -                       | (+1.7) | Ribosome                                                                                                   |
| A51V02                    | rplM                         | 50S ribosomal protein L13                                                                | (-1.8)                | -                     | -                      | -                       | -      | Ribosome                                                                                                   |
| A6QE19                    | rplK                         | 50S ribosomal protein L11                                                                | -                     | (+1.8)                | -                      | -                       | (+2.0) | Ribosome                                                                                                   |
| A51V15                    | rplO                         | 50S ribosomal protein L15                                                                | -                     | (+1.7)                | -                      | -                       | -      | Ribosome                                                                                                   |
| A51V24                    | rplN                         | 50S ribosomal protein L14                                                                | (-2.1)                | -                     | -                      | -                       | -      | Ribosome                                                                                                   |
| A51V07                    | rplQ                         | 50S ribosomal protein L17                                                                | -                     | (+2.2)                | -                      | -                       | (+2.1) | Ribosome                                                                                                   |
| A51V27                    | rplP                         | 50S ribosomal protein L16                                                                | (-1.8)                | -                     | -                      | -                       | -      | Ribosome                                                                                                   |
| A51TH1                    | rplU                         | 50S ribosomal protein L21                                                                | -                     | -                     | (-2.0)                 | -                       | -      | Ribosome                                                                                                   |
| A51TK3                    | rplT                         | 50S ribosomal protein L20                                                                | -                     | -                     | (-1.6)                 | -                       | (-1.6) | Ribosome                                                                                                   |

|                              |                  |                                                                              |  |                        |                       |                       |        |        |                                                                                 |
|------------------------------|------------------|------------------------------------------------------------------------------|--|------------------------|-----------------------|-----------------------|--------|--------|---------------------------------------------------------------------------------|
| A5IV32                       | rplW             | 50S ribosomal protein L23                                                    |  | (-3.3                  | -                     | -                     | -      | -      | Ribosome                                                                        |
| A5IV29                       | rplV             | 50S ribosomal protein L22                                                    |  | (-1.7                  | -                     | -                     | -      | -      | Ribosome                                                                        |
| A5ITG9                       | rpmA             | 50S ribosomal protein L27                                                    |  | (-2.0                  | -                     | -                     | (-)2.0 | -      | Ribosome                                                                        |
| A5IV23                       | rplX             | 50S ribosomal protein L24                                                    |  | (-2.8                  | -                     | -                     | -      | (+)2.0 | Ribosome                                                                        |
| A5IV11                       | rpmJ             | 50S ribosomal protein L36                                                    |  |                        | (+)3.6                | -                     | (+)3.8 | -      | Ribosome                                                                        |
| A8Z216                       | rpmG2            | 50S ribosomal protein L33 2                                                  |  | (+)5.4                 | (+)6.1                | -                     | -      | -      | Ribosome                                                                        |
| A5IR09                       | SaurJH9_0830     | Thioredoxin domain                                                           |  | (-1.7                  | -                     | -                     | -      | -      |                                                                                 |
| E5QS12                       | HMPREF0772_11212 | Uncharacterized protein                                                      |  | -                      | -                     | (+)1.6                | -      | -      |                                                                                 |
| A5IQA0                       | rpsG             | 30S ribosomal protein S7                                                     |  |                        | (+)1.7                | -                     | -      | -      | Ribosome                                                                        |
| A5IPU6                       | rpsF             | 30S ribosomal protein S6                                                     |  | (-3.1                  | (-)1.8                | -                     | -      | -      | Ribosome                                                                        |
| A5ITP2                       | rpsD             | 30S ribosomal protein S4                                                     |  | -                      | (+)1.8                | -                     | -      | -      | Ribosome                                                                        |
| A5IV09                       | rpsK             | 30S ribosomal protein S11                                                    |  | -                      | (+)2.0                | -                     | -      | -      | Ribosome                                                                        |
| A5IV35                       | rpsJ             | 30S ribosomal protein S10                                                    |  | (+)2.6                 | (+)3.6                | -                     | -      | -      | Ribosome                                                                        |
| A8Z324                       | rpsI             | 30S ribosomal protein S9                                                     |  | (+)2.7                 | (+)3.4                | -                     | -      | (+)2.7 | Ribosome                                                                        |
| A5IV20                       | rpsH             | 30S ribosomal protein S8                                                     |  | -1.6                   | -                     | -                     | -      | -      | Ribosome                                                                        |
| A5IV10                       | rpsM             | 30S ribosomal protein S13                                                    |  | (+)2.4                 | (+)3.6                | -                     | -      | -      | Ribosome                                                                        |
| A5IQ99                       | rpsL             | 30S ribosomal protein S12                                                    |  | (+)5.8                 | (+)5.9                | -                     | -      | -      | Ribosome                                                                        |
| A5IV30                       | rpsS             | 30S ribosomal protein S19                                                    |  | -                      | -                     | -                     | -      | (-)2.1 | Ribosome                                                                        |
| A5IPU8                       | rpsR             | 30S ribosomal protein S18                                                    |  | (-)2.0                 | (-)1.7                | -                     | -      | -      | Ribosome                                                                        |
| A5IT04                       | SaurJH9_1533     | SSU ribosomal protein S1P                                                    |  | (+)1.7                 | -                     | -                     | -      | -      | Ribosome                                                                        |
| A5ISP8                       | SaurJH9_1427     | Peptidase M42 family protein                                                 |  | -                      | -                     | -                     | -      | (+)1.6 |                                                                                 |
| RNA Metabolism               |                  |                                                                              |  |                        |                       |                       |        |        |                                                                                 |
| A5IQ56                       | SaurJH9_0525     | Transcription-repair coupling factor                                         |  | (+7.2<br>(Induction)   | (+)5.8<br>(Induction) | -                     | (+)4.8 | -      | Nucleotide excision repair                                                      |
| A5IQY4                       | rnr              | Ribonuclease R (EC 3.1.13.1)                                                 |  | (+)1.7                 | -                     | -                     | -      | -      | RNA degradation                                                                 |
| A5ISH6                       | miaB             | (Dimethylallyl)adenosine tRNA methylthiotransferase MiaB (EC 2.-.-.-)        |  | (+)12.8                | ND                    | -                     | -      | -      |                                                                                 |
| A5IR24                       | SaurJH9_0846     | SUF system FeS assembly protein, NifU family                                 |  | (+)4.5                 | (+)3.3                | -                     | -      | -      |                                                                                 |
| E5QVT7                       | ypdA             | Bacillithiol system thiol disulfide oxidoreductase, YpdA family (EC 1.8.-.-) |  | -                      | (+)4.8                | -                     | (+)1.9 | -      | Pyrimidine metabolism                                                           |
| E5QR89                       | HMPREF0772_11114 | DEAD/DEAH box helicase                                                       |  | (-1.5                  | -                     | -                     | -      | -      | RNA degradation                                                                 |
| A5ITF1                       | SaurJH9_1684     | Transcriptional regulator, BadM/Rrf2 family                                  |  | -                      | -                     | (+)1.7                | -      | -      |                                                                                 |
| D8HBV7                       | queA             | S-adenosylmethionine:tRNA ribosyltransferase-isomerase (EC 2.4.99.17)        |  | -                      | (+)5.1                | (-)1.7                | (+)1.5 | -      |                                                                                 |
| A5IRD2                       | SaurJH9_0954     | Peptidylprolyl isomerase (EC 5.2.1.8)                                        |  | (-3.5                  | (-)1.6                | -                     | -      | -      |                                                                                 |
| A5IS95                       | rpoZ             | DNA-directed RNA polymerase subunit omega (EC 2.7.7.6)                       |  | -                      | (-)2.2                | -                     | -      | -      | RNA polymerase; Purine metabolism; Pyrimidine metabolism                        |
| A5ITD5                       | greA             | Transcription elongation factor GreA                                         |  | -                      | -                     | -                     | -      | (+)1.8 |                                                                                 |
| Amino Acids and Derivatives  |                  |                                                                              |  |                        |                       |                       |        |        |                                                                                 |
| A5IT44                       | SaurJH9_1574     | Branched-chain alpha-keto acid dehydrogenase E2 component (EC 2.3.1.168)     |  | (+)2.9                 | -                     | -                     | -      | -      | Valine, leucine and isoleucine degradation                                      |
| A5IVV8                       | SaurJH9_2554     | 2-hydroxymethylglutarate dehydratase (EC 4.2.1.-)                            |  | ND                     | ND                    | -                     | (-)4.5 | -      | Cysteine and methionine metabolism; Glycine, serine and threonine metabolism    |
| A6QFC7                       | sufS             | Cysteine desulfurase SufS subfamily protein                                  |  | -                      | -                     | -                     | (+)1.9 | -      | Thiamine metabolism                                                             |
| A5IST2                       | lysA             | Diaminopimelate decarboxylase (DAP decarboxylase) (DAPDC) (EC 4.1.1.20)      |  | (+)5.5<br>(Induction)  | -                     | -                     | -      | -      | Lysine biosynthesis                                                             |
| A5IVB3                       | hutU             | Urocanate hydratase (Urocanase) (EC 4.2.1.49)                                |  | ND                     | ND                    | (+)8.1<br>(Induction) | ND     | ND     | Histidine metabolism                                                            |
| D9RNE5                       | rocD             | Ornithine aminotransferase (OAT) (EC 2.6.1.13)                               |  | -                      | (-)2.2                | -                     | -      | -      | Arginine and proline metabolism                                                 |
| A5IVY0                       | rocA             | 1-pyrroline-5-carboxylate dehydrogenase (P5C dehydrogenase) (EC 1.2.1.88)    |  | (+)1.6                 | -                     | -                     | -      | -      | Alanine, aspartate and glutamate metabolism; Arginine and proline metabolism    |
| A5IQA4                       | SaurJH9_0573     | 2-amino-3-ketobutyrate coenzyme A ligase (EC 2.3.1.29)                       |  | (+)2.7                 | (+)2.9                | -                     | -      | -      | Glycine, serine and threonine metabolism                                        |
| A5IV71                       | ureC             | Urease subunit alpha (EC 3.5.1.5)                                            |  | (+)3.0                 | (+)1.5                | (+)3.4                | (+)2.1 | -      | Arginine and proline metabolism; Purine metabolism                              |
| A5IV72                       | ureE             | Urease accessory protein UreE                                                |  | -                      | (+)4.0<br>(Induction) | (+)4.2                | -      | -      |                                                                                 |
| A5IV74                       | ureG             | Urease accessory protein UreG                                                |  | (+)13.9<br>(Induction) | ND                    | (+)2.5                | (+)2.1 | ND     |                                                                                 |
| A5IUA5                       | SaurJH9_1994     | Aminotransferase (EC 2.6.1.-)                                                |  | (+)2.3                 | -                     | -                     | -      | -      |                                                                                 |
| Clustering-based subsystems; |                  |                                                                              |  |                        |                       |                       |        |        |                                                                                 |
| A5IRX7                       | SaurJH9_1150     | UPF0356 protein SaurJH9_1150                                                 |  | (-3.1                  | (-)2.9                | -                     | (-)1.7 | (-)3.5 |                                                                                 |
| A5INQ8                       | purA             | Adenylosuccinate synthetase (AMPSase) (AdSS) (EC 6.3.4.4)                    |  | (-1.9                  | -                     | -                     | -      | -      |                                                                                 |
| A5INQ7                       | SaurJH9_0016     | Primary replicative DNA helicase (EC 3.6.1.-)                                |  | (+)14.7                | ND                    | ND                    | -      | -      | DNA replication; Alanine, aspartate and glutamate metabolism; Purine metabolism |
| A5IRX8                       | def              | Peptide deformylase (PDF) (EC 3.5.1.88)                                      |  | (-1.6                  | -                     | -                     | -      | -      |                                                                                 |
| A5IS65                       | rsmH             | Ribosomal RNA small subunit methyltransferase H (EC 2.1.1.199)               |  | (+)3.1                 | (+)2.9                | -                     | -      | -      |                                                                                 |
| D9RL57                       | tig              | Trigger factor (TF) (EC 5.2.1.8) (PPIase)                                    |  | (-1.9                  | -                     | -                     | -      | -      |                                                                                 |
| A5IT95                       | era              | GTPase Era                                                                   |  | (+)2.6                 | -                     | (-)1.9                | -      | -      |                                                                                 |

|                                       |              |                                                                              |                         |                       |                       |          |        |                                                                                                              |
|---------------------------------------|--------------|------------------------------------------------------------------------------|-------------------------|-----------------------|-----------------------|----------|--------|--------------------------------------------------------------------------------------------------------------|
| AS1Q64                                | ftsH         | ATP-dependent zinc metalloprotease FtsH (EC 3.4.24.-)                        | -                       | (-)2.2                | -                     | -        | (-)1.6 |                                                                                                              |
| Fatty Acids, Lipids, and Isoprenoids; |              |                                                                              |                         |                       |                       |          |        |                                                                                                              |
| AS1TM4                                | accD         | Acetyl-coenzyme A carboxylase carboxyl transferase subunit beta (EC 6.4.1.2) | -                       | -                     | -                     | -        | (+)1.8 | Fatty acid biosynthesis; Carbon fixation pathways in prokaryotes; Propanoate metabolism; Pyruvate metabolism |
| AS1SB7                                | acpP         | Acyl carrier protein (ACP)                                                   | (-)2.9                  | (-)2.1                | -                     | -        | -      |                                                                                                              |
| AS1QF9                                | adh          | Alcohol dehydrogenase                                                        | (-)49.1<br>(Repression) | (-)13.1               | -                     | (+)3.2   | (-)4.0 | Tyrosine metabolism; Fatty acid metabolism; Glycolysis / Gluconeogenesis;                                    |
| AS1T02                                | gpsA         | Glycerol-3-phosphate dehydrogenase [NAD(P)+] (EC 1.1.1.94)                   | (+)6.6                  | (+)5.0                | -                     | -        | -      | Glycerophospholipid metabolism                                                                               |
| AS1SB1                                | SaurJH9_1285 | Dak phosphatase                                                              | (+)1.6                  | -                     | -                     | -        | -      |                                                                                                              |
| Nucleosides and Nucleotides           |              |                                                                              |                         |                       |                       |          |        |                                                                                                              |
| AS1S85                                | pyrB         | Aspartate carbamoyltransferase (EC 2.1.3.2)                                  | ND                      | ND                    | (-)2.3                | (-)2.4   | -      | Alanine, aspartate and glutamate metabolism; Pyrimidine metabolism                                           |
| AS1S86                                | pyrC         | Dihydroorotase (DHOase) (EC 3.5.2.3)                                         | (-)2.6                  | (-)1.7                | -                     | -        | (-)1.9 | Pyrimidine metabolism                                                                                        |
| AS1RW1                                | purD         | PhosphoribosylamineNDglycine ligase (EC 6.3.4.13)                            | (+)4.0<br>(Induction)   | ND                    | ND                    | ND       | ND     | Purine metabolism                                                                                            |
| D8HHP3                                | SAOV_1011    | Phosphoribosylaminoimidazole-succinocarboxamide synthase                     | (+)4.0<br>(Induction)   | ND                    | ND                    | ND       | ND     | Purine metabolism                                                                                            |
| AS1TF9                                | apt          | Adenine phosphoribosyltransferase (APRT) (EC 2.4.2.7)                        | -                       | (+)2.4                | -                     | -        | (+)2.1 | Purine metabolism                                                                                            |
| AS1PW9                                | guaB         | Inosine-5'-monophosphate dehydrogenase (EC 1.1.1.205)                        | (+)1.5                  | -                     | -                     | -        | -      | Purine metabolism                                                                                            |
| Cell Wall and Capsule;                |              |                                                                              |                         |                       |                       |          |        |                                                                                                              |
| Q6GEW4                                | mnaA         | UDP-N-acetylglucosamine 2-epimerase (EC 5.1.3.14)                            | (+)13.8                 | ND                    | -                     | -        | ND     | Amino sugar and nucleotide sugar metabolism                                                                  |
| AS1PC6                                | SaurJH9_0242 | CDP-glycerol:poly(Glycerophosphate) glycerophosphotransferase                | (-)2.9                  | (-)2.8                | -                     | -        | (-)2.4 |                                                                                                              |
| AS1U40                                | mgt          | Monofunctional glycosyltransferase (MGT) (EC 2.4.-.-)                        | ND                      | ND                    | (+)7.5<br>(Induction) | ND       | ND     | Peptidoglycan biosynthesis                                                                                   |
| AS1NS0                                | mecA         | Peptidoglycan glycosyltransferase (EC 2.4.1.129)                             | (+)11.8                 | (+)42.0               | ND                    | (+)145.1 | ND     | beta-Lactam resistance                                                                                       |
| AS1UW0                                | SaurJH9_2202 | UTPNDglucose-1-phosphate uridylyltransferase                                 | -                       | (+)2.4                | -                     | -        | -      |                                                                                                              |
| AS1QU2                                | murB         | UDP-N-acetylenolpyruvoylglucosamine reductase (EC 1.3.1.98)                  | ND                      | ND                    | (+)3.1                | ND       | ND     | Amino sugar and nucleotide sugar metabolism; Peptidoglycan biosynthesis                                      |
| E5QR87                                | ddl          | D-alanineNDD-alanine ligase (EC 6.3.2.4)                                     | (+)1.5                  | -                     | -                     | (+)1.6   | -      | D-Alanine metabolism; Peptidoglycan biosynthesis                                                             |
| AS1S69                                | murD         | UDP-N-acetylmuramoylalanineNDD-glutamate ligase (EC 6.3.2.9)                 | -                       | -                     | -                     | (+)1.6   | -      | D-Glutamine and D-glutamate metabolism; Peptidoglycan biosynthesis                                           |
| AS1SB7                                | acpP         | Acyl carrier protein (ACP)                                                   | (-)2.9                  | (-)2.1                | -                     | -        | -      |                                                                                                              |
| AS1RB0                                | dlfA         | D-alanineNDpoly(phosphoribitol) ligase subunit 1 (EC 6.1.1.13)               | -                       | -                     | -                     | -        | (+)1.5 | D-Alanine metabolism; Staphylococcus aureus infection                                                        |
| AS1RB3                                | SaurJH9_0935 | DltD, central domain protein                                                 | (+)4.6                  | -                     | -                     | -        | -      | Staphylococcus aureus infection                                                                              |
| DNA Metabolism;                       |              |                                                                              |                         |                       |                       |          |        |                                                                                                              |
| AS1Q56                                | SaurJH9_0525 | Transcription-repair coupling factor                                         | (+)7.2<br>(Induction)   | (+)5.8<br>(Induction) | -                     | (+)4.8   | -      | Nucleotide excision repair                                                                                   |
| A6QGJ5                                | mutL         | DNA mismatch repair protein MutL                                             | (+)4.9                  | ND                    | ND                    | -        | ND     | Mismatch repair                                                                                              |
| AS1SH9                                | mutS         | DNA mismatch repair protein MutS                                             | -                       | -                     | -                     | (+)1.6   | -      | Mismatch repair                                                                                              |
| AS1NQ7                                | SaurJH9_0016 | Primary replicative DNA helicase (EC 3.6.1.-)                                | (+)14.7                 | ND                    | ND                    | -        | -      | DNA replication; Alanine, aspartate and glutamate metabolism; Purine metabolism                              |
| AS1QW3                                | uvrA         | UvrABC system protein A (UvrA protein) (Excinuclease ABC subunit A)          | -                       | (-)1.6                | -                     | -        | (-)2.9 | Nucleotide excision repair                                                                                   |
| E5QS79                                | uvrB         | UvrABC system protein B (Protein UvrB) (Excinuclease ABC subunit B)          | (+)5.3<br>(Induction)   | ND                    | (+)3.1                | -        | -      | Nucleotide excision repair                                                                                   |
| AS1SX1                                | SaurJH9_1500 | 5'-3' exonuclease                                                            | -                       | -                     | -                     | (+)1.8   | -      |                                                                                                              |
| AS1NP3                                | SaurJH9_0002 | DNA polymerase III subunit beta (EC 2.7.7.7)                                 | (+)1.5                  | -                     | -                     | -        | -      | DNA replication; Mismatch repair; Purine metabolism; Pyrimidine metabolism                                   |
| AS1SE8                                | polC         | DNA polymerase III polC-type (PolIII) (EC 2.7.7.7)                           | (+)3.7                  | -                     | -                     | -        | -      | DNA replication; Mismatch repair; Purine metabolism; Pyrimidine metabolism                                   |
| AS1NP2                                | dnaA         | Chromosomal replication initiator protein DnaA                               | -                       | -                     | (-)2.1                | -        | -      | Two-component system                                                                                         |
| AS1U72                                | SaurJH9_1960 | ATP-dependent DNA helicase PcrA (EC 3.6.1.-)                                 | (+)1.6                  | -                     | -                     | -        | -      | Nucleotide excision repair; Mismatch repair                                                                  |
| AS1SY5                                | SaurJH9_1514 | DnaQ family exonuclease/DinG family helicase, putative                       | -                       | -                     | -                     | (+)3.0   | -      |                                                                                                              |
| AS1Q79                                | SaurJH9_0548 | DNA repair protein radA                                                      | -                       | -                     | (+)1.9                | (+)2.3   | -      |                                                                                                              |
| AS1T48                                | SaurJH9_1578 | DNA repair protein RecN (Recombination protein N)                            | -                       | -                     | (+)3.0                | -        | -      |                                                                                                              |
| AS1TS2                                | xseA         | Exodeoxyribonuclease 7 large subunit (EC 3.1.11.6)                           | (+)4.9                  | -                     | -                     | -        | -      | Mismatch repair                                                                                              |
| Respiration;                          |              |                                                                              |                         |                       |                       |          |        |                                                                                                              |
| AS1UP9                                | atpG         | ATP synthase gamma chain                                                     | -                       | (-)1.6                | -                     | -        | (-)1.8 | Bacterial secretion system; Protein export                                                                   |
| AS1UQ0                                | atpA         | ATP synthase subunit alpha (EC 3.6.3.14)                                     | -                       | (-)1.8                | -                     | -        | -      | Oxidative phosphorylation; Photosynthesis                                                                    |
| AS1UQ1                                | atpH         | ATP synthase subunit delta                                                   | -                       | (+)1.6                | -                     | -        | -      | Oxidative phosphorylation; Photosynthesis                                                                    |
| AS1RX3                                | SaurJH9_1146 | Cytochrome bd ubiquinol oxidase, subunit I                                   | ND                      | ND                    | -                     | (+)1.9   | -      | Two-component system; Oxidative phosphorylation                                                              |
| AS1V90                                | SaurJH9_2333 | Formate dehydrogenase, alpha subunit                                         | -                       | ND                    | ND                    | (+)1.7   | ND     |                                                                                                              |

| Cell Division and Cell Cycle;  |                  |                                                                         |                       |         |                        |                         |        |                                                                                                                                                                                                                         |
|--------------------------------|------------------|-------------------------------------------------------------------------|-----------------------|---------|------------------------|-------------------------|--------|-------------------------------------------------------------------------------------------------------------------------------------------------------------------------------------------------------------------------|
| A5ISB9                         | smc              | Chromosome partition protein Smc                                        | -                     | -       | -                      | (+)1.6                  | -      |                                                                                                                                                                                                                         |
| A5IS88                         | carB             | Carbamoyl-phosphate synthase large chain (EC 6.3.5.5)                   | (-)2.5                | (-)2.3  | -                      | (-)2.2                  | (-)2.5 | Alanine, aspartate and glutamate metabolism; Pyrimidine metabolism                                                                                                                                                      |
| A5IS87                         | carA             | Carbamoyl-phosphate synthase small chain (EC 6.3.5.5)                   | ND                    | ND      | (-)2.4                 | -                       | ND     | Alanine, aspartate and glutamate metabolism; Pyrimidine metabolism                                                                                                                                                      |
| Regulation and Cell signaling; |                  |                                                                         |                       |         |                        |                         |        |                                                                                                                                                                                                                         |
| A5IVW6                         | SaurJH9_2562     | Pyruvate oxidase (EC 1.2.3.3)                                           | -                     | -       | (+)1.7                 | (+)2.0                  | -      | Pyruvate metabolism                                                                                                                                                                                                     |
| A6QHH6                         | relA             | GTP pyrophosphokinase                                                   | (+)4.0<br>(Induction) | ND      | ND                     | ND                      | ND     | Purine metabolism                                                                                                                                                                                                       |
| Not assigned                   |                  |                                                                         |                       |         |                        |                         |        |                                                                                                                                                                                                                         |
| E5QTK7                         | sdrD             | Serine-aspartate repeat-containing protein D                            | (-)24.3               | -       | (-)9.2                 | (-)2.0                  | -      |                                                                                                                                                                                                                         |
| E5QWJ9                         | HMPREF0772_10696 | LPXTG-motif cell wall anchor domain protein                             | (-)44.1               | (-)9.1  | (-)2.7<br>(Repression) | (-)22.8                 | (-)5.7 |                                                                                                                                                                                                                         |
| A5ISU2                         | SaurJH9_1471     | Uncharacterized protein                                                 | (-)15.2               | (-)5.2  | -                      | -                       | -      |                                                                                                                                                                                                                         |
| A5IRR5                         | SaurJH9_1087     | Uncharacterized protein-like protein                                    | (-)7.5                | (-)5.9  | -                      | (-)3.3                  | (-)3.0 |                                                                                                                                                                                                                         |
| E5QS9                          | sle              | N-acetylmuramoyl-L-alanine amidase Sle1 (EC 3.5.1.28)                   | (-)7.3                | (-)3.5  | -                      | (-)2.7                  | -      |                                                                                                                                                                                                                         |
| A5IVG3                         | SaurJH9_2406     | Pyridoxamine 5'-phosphate oxidase-related, FMN-binding                  | (-)6.2                | -       | -                      | -                       | -      |                                                                                                                                                                                                                         |
| A5IQZ6                         | SaurJH9_0817     | Cold-shock DNA-binding protein family                                   | (-)5.1                | (-)2.9  | -                      | -                       | (-)6.5 |                                                                                                                                                                                                                         |
| A5IRW9                         | SaurJH9_1142     | Uncharacterized protein                                                 | (-)4.4                | (-)2.7  | -                      | (+)9.0                  | -      |                                                                                                                                                                                                                         |
| A5IQG7                         | SaurJH9_0636     | Uncharacterized protein                                                 | (-)4.1                | (-)5.0  | -                      | -                       | (-)3.9 |                                                                                                                                                                                                                         |
| A7WYP8                         | spoVG            | Putative septation protein SpoVG                                        | (-)3.5                | (-)2.5  | -                      | -                       | -      |                                                                                                                                                                                                                         |
| A5ITE0                         | SaurJH9_1672     | UPF0473 protein SaurJH9_1672                                            | (-)3.4                | (-)2.6  | -                      | -                       | -      |                                                                                                                                                                                                                         |
| A5IV12                         | infA             | Translation initiation factor IF-1                                      | (-)3.3                | (-)2.2  | -                      | -                       | -      |                                                                                                                                                                                                                         |
| A5IU42                         | SaurJH9_1930     | Uncharacterized protein                                                 | (-)3.1                | -       | -                      | (-)2.1                  | -      |                                                                                                                                                                                                                         |
| A5IST4                         | SaurJH9_1463     | Cold-shock DNA-binding protein family                                   | (-)3.0                | (-)1.6  | -                      | -                       | -      |                                                                                                                                                                                                                         |
| D8HHN4                         | SAOV_1002c       | Probable exported protein                                               | (-)3.0                | (-)4.1  | -                      | -                       | (-)3.1 |                                                                                                                                                                                                                         |
| A5ITK2                         | SaurJH9_1735     | NUDX1 hydrolase                                                         | (-)3.0                | (-)2.5  | -                      | -                       | -      |                                                                                                                                                                                                                         |
| A5IVZ4                         | isaA             | Transglycosylase domain protein, probable transglycosylase IsaA         | (-)2.7                | (-)10.2 | -                      | (-)6.1                  | (-)2.3 |                                                                                                                                                                                                                         |
| A5IRB4                         | SaurJH9_0936     | Nitrogen-fixing NifU domain protein                                     | (-)2.6                | (-)2.1  | -                      | -                       | (-)1.8 |                                                                                                                                                                                                                         |
| A5IQA5                         | hchA             | Molecular chaperone Hsp31 and glyoxalase 3 (EC 4.2.1.130)               | (-)2.3                | -       | -                      | -                       | -      |                                                                                                                                                                                                                         |
| A5IVM3                         | SaurJH9_2469     | NAD-dependent epimerase/dehydratase                                     | (-)2.3                | -       | -                      | -                       | -      |                                                                                                                                                                                                                         |
| E5QSP5                         | HMPREF0772_11290 | Glucosamine-6-phosphate isomerase family protein                        | (-)2.1                | (-)1.6  | -                      | -                       | -      |                                                                                                                                                                                                                         |
| A5ISP4                         | SaurJH9_1423     | Cell envelope-related transcriptional attenuator                        | (-)2.0                | (-)2.0  | -                      | -                       | (-)2.3 |                                                                                                                                                                                                                         |
| E5QT14                         | HMPREF0772_10107 | Uncharacterized protein                                                 | (-)2.0                | -       | -                      | (-)2.4                  | -      |                                                                                                                                                                                                                         |
| A5IU10                         | SaurJH9_1898     | UPF0342 protein SaurJH9_1898                                            | (-)1.9                | (-)1.9  | -                      | -                       | -      |                                                                                                                                                                                                                         |
| A5ITQ1                         | tyrS             | TyrosineNDtRNA ligase (EC 6.1.1.1)                                      | (-)1.8                | -       | -                      | -                       | -      | Aminoacyl-tRNA biosynthesis                                                                                                                                                                                             |
| A5IUX1                         | SaurJH9_2213     | Uncharacterized protein                                                 | (-)1.8                | -       | -                      | -                       | -      |                                                                                                                                                                                                                         |
| E5QY31                         | HMPREF0772_12121 | Uncharacterized protein                                                 | (-)1.8                | -       | -                      | -                       | -      |                                                                                                                                                                                                                         |
| A6U1G3                         | SaurJH1_1431     | UPF0154 protein SaurJH1_1431                                            | (-)1.8                | (-)2.2  | (-)1.8                 | -                       | -      |                                                                                                                                                                                                                         |
| A5ISE3                         | frf              | Ribosome-recycling factor                                               | (-)1.7                | -       | -                      | -                       | -      |                                                                                                                                                                                                                         |
| A5IT18                         | valS             | ValineNDtRNA ligase (EC 6.1.1.9)                                        | (-)1.7                | -       | -                      | -                       | -      | Aminoacyl-tRNA biosynthesis                                                                                                                                                                                             |
| A5ISV1                         | SaurJH9_1480     | Carboxyl-terminal protease (EC 3.4.21.102)                              | (-)1.7                | (-)5.4  | (+)2.2                 | -                       | (-)4.6 |                                                                                                                                                                                                                         |
| A6QHS1                         | NWMN_1631        | Uncharacterized protein                                                 | (-)1.7                | (-)1.8  | -                      | -                       | -      |                                                                                                                                                                                                                         |
| A5IU68                         | gatC             | Aspartyl/glutamyl-tRNA(Asn/Gln) amidotransferase subunit C (EC 6.3.5.-) | (-)1.6                | (-)1.5  | -                      | -                       | -      | Aminoacyl-tRNA biosynthesis                                                                                                                                                                                             |
| A6QDQ0                         | lytM             | Peptidoglycan hydrolase                                                 | (-)1.5                | (-)2.1  | -                      | (-)23.9<br>(Repression) | (-)2.2 |                                                                                                                                                                                                                         |
| A5IRE9                         | SaurJH9_0971     | Cof-like hydrolase                                                      | (+)1.5                | -       | -                      | -                       | -      |                                                                                                                                                                                                                         |
| A5IPC5                         | SaurJH9_0241     | Alcohol dehydrogenase GroES domain protein                              | (+)1.5                | -       | -                      | -                       | -      | Tyrosine metabolism; Fatty acid metabolism; Glycolysis / Gluconeogenesis                                                                                                                                                |
| E5QTL6                         | HMPREF0772_12636 | NAD dependent epimerase/dehydratase family protein                      | (+)1.6                | -       | -                      | -                       | -      | Amino sugar and nucleotide sugar metabolism; Galactose metabolism                                                                                                                                                       |
| Q6GCE3                         | SAS0305          | Putative reductase                                                      | (+)1.6                | -       | -                      | -                       | -      |                                                                                                                                                                                                                         |
| A5ITF5                         | hisS             | HistidineNDtRNA ligase (EC 6.1.1.21)                                    | (+)1.7                | (+)1.8  | -                      | -                       | -      | Aminoacyl-tRNA biosynthesis                                                                                                                                                                                             |
| A5IRZ0                         | SaurJH9_1163     | Uncharacterized protein                                                 | (+)1.8                | ND      | ND                     | -                       | -      |                                                                                                                                                                                                                         |
| A5ISB0                         | SaurJH9_1284     | Uncharacterized protein                                                 | (+)1.8                | -       | -                      | -                       | -      |                                                                                                                                                                                                                         |
| Q2FDD7                         | repA             | Replication initiator protein                                           | (+)1.9                | -       | (+)2.0                 | (+)1.6                  | -      |                                                                                                                                                                                                                         |
| A5IPT5                         | SaurJH9_0402     | Acetyl-CoA acetyltransferase (EC 2.3.1.9)                               | (+)1.9                | -       | -                      | -                       | -      | Two-component system; Valine, leucine and isoleucine degradation; Tryptophan metabolism; Fatty acid metabolism; Carbon fixation pathways in prokaryotes; Lysine degradation; Propanoate metabolism; Pyruvate metabolism |
| A5ITQ0                         | SaurJH9_1783     | 2-alkenal reductase (EC 1.3.1.74)                                       | (+)1.9                | -       | (+)2.0                 | -                       | -      |                                                                                                                                                                                                                         |

|        |                     |                                                                                                                        |                        |                        |       |       |                         |                                                                    |
|--------|---------------------|------------------------------------------------------------------------------------------------------------------------|------------------------|------------------------|-------|-------|-------------------------|--------------------------------------------------------------------|
| E5QVA9 | HMPREF0772_11628    | Peptidase T-like protein                                                                                               | (+1.9                  | (+2.3                  | -     | (+1.8 | -                       |                                                                    |
| A8Z438 | USA300HOU_1396      | Glycosyltransferase (EC 2.4.1.-) group 1 family protein                                                                | (+2.0                  | -                      | -     | -     | -                       |                                                                    |
| A5IT20 | SaurJH9_1549        | Two component transcriptional regulator, winged helix family                                                           | (+2.0                  | -                      | -     | -     | -                       | Two-component system                                               |
| A5IT05 | cmk                 | Cytidylate kinase (CK) (EC 2.7.4.25)                                                                                   | (+2.0                  | (+1.6                  | -     | -     | (+1.7                   | Pyrimidine metabolism                                              |
| A820M1 | USA300HOU_0269      | Glycosyltransferase (EC 2.4.1.-) group 2 family protein                                                                | (+2.0                  | -                      | -     | -     | -                       |                                                                    |
| D9RIN2 | PepF                | Oligoendopeptidase F                                                                                                   | (+2.0                  | -                      | -     | -     | -                       |                                                                    |
| A6QGV7 | NWMN_1317           | Uncharacterized protein                                                                                                | (+2.1                  | (+1.8                  | (+1.8 | (+1.5 | -                       |                                                                    |
| A5IT91 | SaurJH9_1621        | Putative pyruvate, phosphate dikinase regulatory protein (EC 2.7.11.32) (EC 2.7.4.27)                                  | (+2.1                  | -                      | -     | (+2.8 | -                       |                                                                    |
| A5ITD7 | SaurJH9_1669        | Peptidase U32                                                                                                          | (+2.2                  | -                      | -     | -     | -                       | Epithelial cell signaling in Helicobacter pylori infection         |
| A5IUN6 | yidC                | Membrane protein insertase YidC                                                                                        | (+2.2                  | -                      | -     | -     | -                       |                                                                    |
| A5IT80 | pbp3                | Penicillin-binding protein 3, transpeptidase                                                                           | (+2.3                  | -                      | -     | -     | -                       | Peptidoglycan biosynthesis                                         |
| A5IUM8 | murF                | UDP-N-acetylmuramoyl-tripeptideNDD-alanyl-D-alanine ligase (EC 6.3.2.10)                                               | (+2.3                  | (+1.6                  | -     | -     | -                       | Lysine biosynthesis; Peptidoglycan biosynthesis                    |
| A5IT37 | SaurJH9_1566        | Glyoxalase/bleomycin resistance protein/dioxygenase                                                                    | (+2.4                  | -                      | -     | -     | (+2.9                   | Pyruvate metabolism                                                |
| A5IRH7 | SaurJH9_0999        | Oligoendopeptidase F                                                                                                   | (+2.6                  | (+2.0                  | -     | -     | -                       |                                                                    |
| A5ITE2 | SaurJH9_1674        | UPF0297 protein SaurJH9_1674                                                                                           | (+2.6                  | -                      | -     | -     | -                       |                                                                    |
| E5QRM0 | HMPREF0772_11165    | Nitroreductase family protein                                                                                          | (+2.6                  | -                      | -     | -     | -                       |                                                                    |
| E5QY80 | fofD                | Bifunctional protein FofD                                                                                              | (+2.7                  | (+1.6                  | -     | -     | -                       | Carbon fixation pathways in prokaryotes                            |
| Q2FDA8 | SAUSA300_pUSA030030 | Uncharacterized protein                                                                                                | (+2.9                  | -                      | -     | -     | -                       |                                                                    |
| A5IQA9 | SaurJH9_0578        | HAD-superfamily hydrolase, subfamily IA, variant 1                                                                     | (+3.0                  | -                      | -     | -     | (+2.9                   | Glyoxylate and dicarboxylate metabolism                            |
| A5IQ95 | SaurJH9_0564        | 16S rRNA m(2)G 1207 methyltransferase (EC 2.1.1.171)                                                                   | (+3.2                  | -                      | -     | -     | -                       |                                                                    |
| A5IW71 | SaurJH9_2668        | CHAP domain containing protein                                                                                         | (+3.2                  | ND                     | -     | -     | -                       |                                                                    |
| A5IU50 | SaurJH9_1938        | Two component transcriptional regulator, LuxR family                                                                   | (+3.7                  | ND                     | (+3.0 | -     | -                       | Two-component system                                               |
| A5ITT5 | SaurJH9_1818        | Alpha/beta hydrolase fold                                                                                              | (+3.7                  | ND                     | -     | -     | -                       |                                                                    |
| A5IU07 | SaurJH9_1895        | Metal dependent phosphohydrolase                                                                                       | (+4.0                  | ND                     | -     | -     | -                       |                                                                    |
| A5IUJ3 | SaurJH9_2084        | ABC transporter related                                                                                                | (+4.5                  | ND                     | ND    | -     | -                       |                                                                    |
| E5QV1  | aroA                | 3-phosphoshikimate 1-carboxyvinyltransferase (EC 2.5.1.19)                                                             | (+4.6                  | ND                     | ND    | -     | -                       | Phenylalanine, tyrosine and tryptophan biosynthesis                |
| Q2FDA7 | SAUSA300_pUSA030031 | LtrC-like protein                                                                                                      | (+4.6                  | -                      | -     | -     | -                       |                                                                    |
| A5INS8 | ermA                | rRNA (Adenine-N(6)-)-methyltransferase                                                                                 | (+4.7                  | (+4.2                  | -     | -     | (+7.4                   |                                                                    |
| A5ISV4 | msrB                | Peptide methionine sulfoxide reductase MsrB (EC 1.8.4.12)                                                              | (+4.8                  | -                      | (+1.8 | -     | -                       |                                                                    |
| A5ISH1 | SaurJH9_1347        | Uncharacterized protein                                                                                                | (+5.7                  | -                      | -     | -     | -                       |                                                                    |
| A6QED6 | tmk                 | Thymidylate kinase (EC 2.7.4.9) (dTMP kinase)                                                                          | (+6.3                  | (+4.8                  | -     | (+2.2 | (+5.6                   | Pyrimidine metabolism                                              |
| A8Z1L4 | purH                | Bifunctional purine biosynthesis protein PurH                                                                          | (+9.8                  | ND                     | ND    | -     | -                       | One carbon pool by folate; Purine metabolism                       |
| D9RDE0 | SAA6159_00214       | ABC superfamily ATP binding cassette transporter, binding protein                                                      | (+3.9<br>(Induction)   | ND                     | -     | -     | -                       |                                                                    |
| A5IU99 | SaurJH9_1988        | ABC transporter related                                                                                                | (+12.2<br>(Induction)  | ND                     | (+3.3 | -     | -                       | ABC transporters                                                   |
| A5ISN5 | SaurJH9_1414        | HesB/YadR/YfhF-family protein                                                                                          | (+4.0<br>(Induction)   | ND                     | -     | -     | -                       |                                                                    |
| E5QUJ2 | HMPREF0772_11518    | Luciferase family oxidoreductase, FMN-dependent, PP_0088 family (EC 1.-.-.-)                                           | (+5.8<br>(Induction)   | (+4.0<br>(Induction)   | ND    | (+2.7 | ND                      |                                                                    |
| A5ISV5 | msrA                | Peptide methionine sulfoxide reductase MsrA (EC 1.8.4.11)                                                              | (+8.5<br>(Induction)   | ND                     | (+8.0 | ND    | ND                      |                                                                    |
| A5ISH4 | SaurJH9_1350        | Pyruvate ferredoxin/flavodoxin oxidoreductase, beta subunit                                                            | (+4.0<br>(Induction)   | ND                     | ND    | ND    | ND                      | Citrate cycle (TCA cycle); Carbon fixation pathways in prokaryotes |
| A5ISS3 | SaurJH9_1452        | Uncharacterized protein-like protein                                                                                   | (+6.1<br>(Induction)   | (+3.8<br>(Induction)   | ND    | ND    | ND                      |                                                                    |
| Q6GGX3 | ebh SAR1447         | Extracellular matrix-binding protein ebh (ECM-binding protein homolog)                                                 | (-27.7<br>(Repression) | (-4.8                  | ND    | ND    | (-10.7)<br>(Repression) |                                                                    |
| A5IUP1 | sceD SaurJH9_2132   | Transglycosylase domain protein,probable transglycosylase SceD                                                         | (-22.9<br>(Repression) | (-12.5<br>(Repression) | ND    | -     | ND                      |                                                                    |
| A5IQJ6 | SaurJH9_0666        | ABC transporter related                                                                                                | -                      | -                      | (+1.9 | -     | -                       |                                                                    |
| A5IWE3 | SaurJH9_2761        | Aminoglycoside phosphotransferase                                                                                      | -                      | -                      | -     | (+2.0 | -                       |                                                                    |
| A8Z3P8 | USA300HOU_1149      | Bifunctional phosphopantothenoilcysteine decarboxylase/phosphopantothenateNDCysteine ligase (EC 4.1.1.36) (EC 6.3.2.5) | -                      | -                      | (+1.5 | (+2.0 | -                       | Pantothenate and CoA biosynthesis                                  |
| E5QR16 | HMPREF0772_11041    | Cof-like hydrolase                                                                                                     | -                      | -                      | -     | (+2.1 | -                       |                                                                    |
| D3ETT8 | SA2981_0533         | Deoxyadenosine kinase / Deoxyguanosine kinase (EC 2.7.1.113) (EC 2.7.1.76)                                             | -                      | (+1.9                  | -     | -     | -                       |                                                                    |
| A5ISX2 | SaurJH9_1501        | Dynamin family protein                                                                                                 | -                      | -                      | -     | (+2.3 | -                       |                                                                    |
| E5QTK9 | azo                 | FMN-dependent NADPH-azoreductase (EC 1.7.-.-)                                                                          | -                      | -                      | (+1.8 | -     | -                       |                                                                    |
| A5ITR7 | SaurJH9_1800        | Glutamyl aminopeptidase (EC 3.4.11.7)                                                                                  | ND                     | (+7.2                  | -     | -     | -                       |                                                                    |
| E5QSC4 | ltaS                | Glycerol phosphate lipoteichoic acid synthase (EC 2.7.8.-)                                                             | -                      | (-14.7                 | -     | (-2.5 | -                       |                                                                    |
| A5ISY0 | SaurJH9_1509        | Glycosyl transferase, family 51                                                                                        | -                      | (-1.5                  | -     | -     | -                       | Peptidoglycan biosynthesis                                         |
| D1GTX1 | isaB                | Immunodominant antigen B                                                                                               | -                      | -                      | (+2.4 | -     | -                       |                                                                    |

|        |                     |                                                                     |                         |                        |                        |                         |                        |                                                                    |
|--------|---------------------|---------------------------------------------------------------------|-------------------------|------------------------|------------------------|-------------------------|------------------------|--------------------------------------------------------------------|
| A7WWT7 | aadD                | Kanamycin nucleotidyltransferase                                    | -                       | -                      | (+)1.7                 | -                       | -                      |                                                                    |
| A5IRC0 | SaurJH9_0942        | Leucyl aminopeptidase (EC 3.4.11.1)                                 | -                       | -                      | (+)2.2                 | -                       | -                      |                                                                    |
| A7WZ39 | SAHV_0592           | Mercuric reductase homologue                                        | -                       | (+)3.3                 | -                      | -                       | -                      |                                                                    |
| A5ISH2 | SaurJH9_1348        | Metallophosphoesterase                                              | -                       | (+)3.2                 | -                      | -                       | -                      |                                                                    |
| A5IV82 | SaurJH9_2325        | NAD/NADP octopine/nopaline dehydrogenase                            | -                       | -                      | -                      | (+)1.7                  | -                      |                                                                    |
| A5IVV0 | SaurJH9_2546        | Nitroreductase                                                      | -                       | -                      | -                      | (+)1.7                  | -                      |                                                                    |
| A5IQU7 | pepT                | Peptidase T (EC 3.4.11.4)                                           | -                       | -                      | (+)2.6                 | -                       | -                      |                                                                    |
| Q2YYU5 | SAB2172             | Probable secretory antigen                                          | -                       | (-)3.2                 | -                      | -                       | (-)2.5                 |                                                                    |
| D8HDH4 | spa                 | Protein A                                                           | ND                      | ND                     | (-)4.5<br>(Repression) | ND                      | ND                     |                                                                    |
| E5QWF6 | ptsG                | PTS system, glucose-specific IIBC component (EC 2.7.1.69)           | -                       | -                      | -2.6                   | (+)1.8                  | -1.8                   |                                                                    |
| Q2FDC9 | SAUSA300_pUSA030009 | Putative regulator of transfer genes ArtA                           | -                       | -                      | (+)1.9                 | -                       | -                      |                                                                    |
| D8HC44 | SAOV_1724           | Putative uncharacterized protein                                    | -                       | -                      | (-)2.4                 | -                       | -                      |                                                                    |
| Q2YXM8 | SAB1151             | Pyruvate ferredoxin oxidoreductase alpha chain (EC 1.2.7.1)         | -                       | -                      | (+)3.3                 | (+)3.3                  | -                      | Citrate cycle (TCA cycle); Carbon fixation pathways in prokaryotes |
| A5IT81 | SaurJH9_1611        | Superoxide dismutase (EC 1.15.1.1)                                  | -                       | (+)1.7                 | -                      | -                       | -                      |                                                                    |
| E5QRW8 | HMPREF0772_12410    | TIGR01777 family protein                                            | -                       | -                      | -                      | (+)1.7                  | -                      |                                                                    |
| A5IQP0 | SaurJH9_0710        | Transcriptional regulator, MarR family                              | -                       | -                      | -                      | -1.5                    | -                      |                                                                    |
| E5QXI6 | HMPREF0772_10873    | Uncharacterized protein                                             | -                       | -                      | (+)3.2                 | (+)2.7                  | -                      |                                                                    |
| A5ITC2 | SaurJH9_1652        | Uncharacterized protein                                             | -                       | -                      | (+)1.7                 | -                       | -                      |                                                                    |
| A5IUW2 | SaurJH9_2204        | Uncharacterized protein                                             | -                       | -                      | -                      | -1.8                    | -                      |                                                                    |
| A5IVL3 | SaurJH9_2459        | Uncharacterized protein                                             | -                       | -                      | -                      | (+)2.6                  | -                      |                                                                    |
| A5IU58 | SaurJH9_1946        | Uncharacterized protein                                             | -                       | (-)1.9                 | -                      | -                       | (-)2.7                 |                                                                    |
| E5QVA7 | HMPREF0772_11626    | Uncharacterized protein                                             | -                       | ND                     | -                      | -                       | (+)2.1                 |                                                                    |
| A5IPW4 | SaurJH9_0432        | Uncharacterized protein                                             | -                       | (+)1.9                 | -                      | -                       | (+)1.8                 |                                                                    |
| A5ITS4 | SaurJH9_1807        | Uncharacterized protein                                             | -                       | -                      | -                      | -                       | (+)1.7                 |                                                                    |
| A5IVI0 | nirB                | Assimilatory nitrite reductase (NAD(P)H) large subunit (EC 1.7.1.4) | (-)35.8                 | (-)6.0                 | -                      | -                       | (-)26.7                | Nitrogen metabolism                                                |
| A5IUL2 | SaurJH9_2103        | Stage II sporulation protein                                        | (-)1.6                  | -                      | -                      | -                       | -                      |                                                                    |
| A6QGK7 | glnA                | Glutamine synthetase (EC 6.3.1.2)                                   | (-)1.6                  | -                      | -                      | -                       | -                      |                                                                    |
| A5ISU1 | SaurJH9_1470        | ATPase associated with various cellular activities, AAA_5           | (+)1.5                  | (-)1.8                 | -                      | -                       | (-)1.8                 |                                                                    |
| A6QIE7 | ppaC                | Probable manganese-dependent inorganic pyrophosphatase (EC 3.6.1.1) | (+)2.0                  | (+)2.0                 | -                      | -                       | -                      |                                                                    |
| A5IWF1 | SaurJH9_2749        | Beta-lactamase (EC 3.5.2.6)                                         | (+)4.0<br>(Induction)   | (+)16.8<br>(Induction) | ND                     | (+)64.6<br>(Induction)  | ND                     |                                                                    |
| A6QJN7 | narG                | Nitrate reductase, alpha subunit                                    | (-)73.4<br>(Repression) | (-)6.4                 | -                      | -                       | (-)28.4                | Nitrogen metabolism                                                |
| A5IVH7 | narH                | Respiratory nitrate reductase beta subunit                          | (-)21.0<br>(Repression) | (-)7.5                 | -                      | -                       | (-)8.1<br>(Repression) | Nitrogen metabolism                                                |
| A5IQI6 | SaurJH9_0656        | ABC transporter related                                             | ND                      | ND                     | -                      | (-)16.6<br>(Repression) | -                      | ABC transporters                                                   |
| A5IUQ9 | SaurJH9_2100        | RNA binding S1 domain protein                                       | -                       | -                      | (-)1.7                 | -                       | -                      |                                                                    |
| D2N839 | SAPIG1763           | Universal stress protein family                                     | -                       | -                      | (+)2.2                 | (+)1.8                  | -                      |                                                                    |
| A6QJP6 | NWWMN_2306          | Zn-binding lipoprotein adcA-like protein                            | -                       | -                      | -                      | (+)2.3                  | -                      |                                                                    |
| A5ITN0 | SaurJH9_1763        | UPF0173 metal-dependent hydrolase SaurJH9_1763                      | -                       | -                      | (+)2.3                 | -                       | -                      |                                                                    |
| A5IQE1 | SaurJH9_0610        | UPF0447 protein SaurJH9_0610                                        | -                       | (+)1.9                 | -                      | -                       | -                      |                                                                    |
| Q2FZ98 | SAOUHSC_01139       | UPF0747 protein SAOUHSC_01139/SAOUHSC_01140/SAOUHSC_01141           | -                       | (+)8.7                 | -                      | -                       | -                      |                                                                    |

Note: The fold changes with (+) stand for up-regulated proteins and those with (-) stand for down-regulated proteins. The symbol of "-" stands for non-differentially expressed protein and "ND" stands for non-detected protein. The proteins which cannot be detected in the blank but detected in the drug treatment group are considered as "induction"; the proteins which can be detected in the blank but cannot be detected in the drug treatment group are considered as "repression". For the induction or repression proteins, the spectral counts are set to 1 for non-detected proteins to calculate fold changes.



Table S2. Minimum inhibitory concentrations (MIC) of oxacillin in the presence of SIPI-8294 and erythromycin against MRSA (ATCC43300), and the fractional inhibitory concentration (FIC) indexes in each case.

| <b>Compound</b> | <b>MIC of compound alone</b> | <b>Concentration (µg/mL)</b> | <b>Oxacillin MIC (µg/mL)</b> | <b>FIC index</b> | <b>Synergy</b> |
|-----------------|------------------------------|------------------------------|------------------------------|------------------|----------------|
| Oxacillin       | 64                           | —                            | —                            | —                | —              |
| SIPI-8294       | 64                           | 4                            | 8                            | 0.19             | Yes            |
|                 |                              | 8                            | 0.25                         | 0.13             |                |
|                 |                              | 16                           | 0.0625                       | 0.25             |                |
| Erythromycin    | >512                         | 4                            | 64                           | 1.01             | No             |
|                 |                              | 32                           | 64                           | 1.06             |                |

Note:  $FIC \leq 0.5$  indicates synergy
